# Supplementary material for: Unscented Kalman Filter-Trained Neural Networks for Slip Model Prediction
Source: PLoS One. 2016 Jul 28;11(7):e0158492. doi: 10.1371/journal.pone.0158492 (PMC4965072; doi:10.1371/journal.pone.0158492)
Supplement: S2 Table — Column description: Xr, Yr: the desired positions in X-axis and Y-axis. X no SP: the actual position without slip prediction in X-axis. Y no SP: the actual position without slip prediction in Y-axis. xe no SP: the position error without slip prediction in vx-axis. ye no SP: the position error without slip prediction in vy-axis. X with SP: the actual position with slip prediction in X-axis. Y with SP: the actual position with slip prediction in Y-axis. xe with SP: the position error with slip prediction in vx-axis. ye with SP: the position error with slip prediction in vy-axis. (XLS) [file pone.0158492.s002.xls]

## Sheet: Sheet1
Xr	Yr	X no SP	Y no SP	xe no SP	ye no SP	X with SP	Y with SP	xe with SP	ye with SP
0	0	0	0	-0.0504193	-0.0504193	0	0	-0.00504193	-0.00504193
0.00019928	6.35398e-09	0.000159108	-1.18381e-08	-0.050372	-0.0504265	0.000200953	3.3144e-09	-0.005038	-0.00504173
0.000464412	3.45085e-08	0.000370853	-6.14364e-08	-0.0503094	-0.0504356	0.000466805	2.15801e-08	-0.00503283	-0.00504142
0.00179007	5.12698e-07	0.00143057	-8.89794e-07	-0.0499974	-0.0504799	0.00179615	3.50173e-07	-0.00500709	-0.00503976
0.00841838	1.13391e-05	0.0067536	-1.96108e-05	-0.0484621	-0.0506697	0.00844496	7.93703e-06	-0.00488047	-0.00502879
0.0415599	0.000276356	0.0339355	-0.000483695	-0.0413844	-0.0508408	0.0417386	0.000196165	-0.00429654	-0.00490831
0.05	0.0004	0.0409952	-0.000701367	-0.317049	-0.347256	0.0490818	0.000271763	-0.0332069	-0.0332563
0.0922005	0.00136015	0.0415843	-0.00141493	-0.160931	-0.410457	0.0818526	0.000432802	-0.0282221	-0.0329952
0.1	0.0016	0.0440427	-0.00235649	0.115577	0.183648	0.0931145	0.000398682	0.0189453	0.0134209
0.15	0.0036	0.112925	-0.0225455	-0.114078	-0.179285	0.146603	0.000971891	-0.0151859	-0.0151528
0.2	0.0064	0.141345	-0.0301101	0.026385	0.0183295	0.193887	0.00228258	0.00337652	0.00124436
0.25	0.01	0.190601	-0.0454261	0.0807452	0.136736	0.244566	0.0042608	0.0114561	0.0106771
0.3	0.0144	0.254503	-0.0573702	0.153981	0.21877	0.296744	0.00755728	0.0177487	0.0185352
0.35	0.0196	0.33674	-0.0562021	0.000682915	0.0566515	0.350046	0.0126279	-0.0014202	0.005215
0.4	0.0256	0.386911	-0.0482201	-0.0687497	0.00545082	0.39978	0.0187607	-0.0080468	-0.000256635
0.45	0.0324	0.424045	-0.0406524	-0.00172311	0.0385966	0.448297	0.0256299	-0.00136895	0.00344453
0.5	0.04	0.47293	-0.0290028	-0.0445566	0.0083504	0.498004	0.0335269	-0.00528542	0.000124133
0.55	0.0484	0.513815	-0.0178397	-0.0338627	0.00538163	0.54699	0.0421599	-0.00408983	-4.43949e-05
0.6	0.0576	0.556517	-0.0054817	0.0839778	0.0613559	0.59619	0.0515947	0.00721671	0.00668315
0.65	0.0676	0.619285	0.0154547	-0.180799	-0.0665651	0.647375	0.0623789	-0.0174482	-0.00893695
0.7	0.0784	0.636854	0.0212572	0.16754	0.0863891	0.694191	0.0728991	0.0156361	0.00958085
0.75	0.09	0.714427	0.0480476	0.437821	0.195259	0.74687	0.0855693	0.0405941	0.0252565
0.8	0.1024	0.832772	0.106982	0.269311	0.0889023	0.803715	0.101156	0.0239515	0.0170401
0.85	0.1156	0.915382	0.160587	-0.436207	-0.0630372	0.857238	0.117793	-0.0398793	-0.0162485
0.9	0.1296	0.891209	0.145008	0.0828918	0.00499042	0.899729	0.131544	0.00730692	0.00199814
0.95	0.1444	0.948309	0.177663	0.170186	0.020778	0.950504	0.148233	0.015496	0.00506448
1	0.16	1.01904	0.218992	0.116031	0.00038826	1.00263	0.16629	0.0105595	0.00215291
1.05	0.1764	1.08129	0.25595	0.0771539	-0.0153787	1.05385	0.184938	0.00698346	-0.000445694
1.1	0.1936	1.13829	0.289016	0.0126996	-0.0384019	1.10447	0.204096	0.000889394	-0.00427107
1.15	0.2116	1.1866	0.315244	0.0135421	-0.045444	1.15412	0.223426	0.000851695	-0.00557467
1.2	0.2304	1.23668	0.33984	-0.0392247	-0.0691053	1.20389	0.243206	-0.00444524	-0.00875705
1.25	0.25	1.2799	0.35825	-0.340026	-0.210179	1.25294	0.262989	-0.0350709	-0.0225507
1.3	0.2704	1.27695	0.357035	-1.54786e-06	-0.0978595	1.29721	0.280662	-0.00251039	-0.0111585
1.35	0.2916	1.32908	0.361948	-0.175213	-0.240848	1.34727	0.300454	-0.0242287	-0.0193615
1.4	0.3136	1.35118	0.360542	-0.0329483	-0.163718	1.39397	0.318879	-0.0104287	-0.0132763
1.45	0.3364	1.38934	0.351566	0.0303155	-0.0563877	1.44327	0.338288	-0.000603013	-0.00689898
1.5	0.36	1.43427	0.338376	0.114211	0.141352	1.49438	0.358816	0.0164579	0.00351777
1.55	0.3844	1.50161	0.326667	0.104546	0.130362	1.54835	0.381508	0.0112176	0.005374
1.6	0.4096	1.57327	0.328421	0.0728224	0.106705	1.60128	0.405166	0.00510735	0.00618921
1.65	0.4356	1.64069	0.341589	0.252918	0.212733	1.653	0.429718	0.0237156	0.0147843
1.7	0.4624	1.73909	0.381914	-0.407517	-0.0323517	1.70743	0.457379	-0.0452397	-0.00476586
1.75	0.49	1.72434	0.374118	-0.112592	0.0302478	1.75059	0.48038	-0.0148904	0.00306988
1.8	0.5184	1.7571	0.391805	0.231077	0.123854	1.79862	0.506773	0.0199417	0.0131374
1.85	0.5476	1.84104	0.448045	0.261412	0.0993176	1.85188	0.537613	0.0224599	0.0143186
1.9	0.5776	1.92153	0.516563	0.0562136	0.060346	1.90502	0.570349	0.00260779	0.00947141
1.95	0.6084	1.96952	0.564278	-0.13229	0.0483499	1.95466	0.602596	-0.0154611	0.0044279
2	0.64	1.99178	0.588913	0.0978126	0.0232893	2.00136	0.63409	0.00751748	0.00663821
2.05	0.6724	2.04031	0.645883	0.28311	-0.0117507	2.05134	0.668909	0.0263025	0.00796212
2.1	0.7056	2.11177	0.72843	0.157359	-0.0170299	2.10386	0.706789	0.0142262	0.00409713
2.15	0.7396	2.17077	0.792924	-0.0474166	-0.0216713	2.15442	0.744365	-0.00584184	-0.00107299
2.2	0.7744	2.20661	0.829636	-0.276022	-0.0361947	2.20212	0.780456	-0.028391	-0.00666964
2.25	0.81	2.21467	0.837116	0.018419	-0.043098	2.24685	0.814476	0.000779835	-0.00533441
2.3	0.8464	2.26462	0.879064	-0.176025	-0.0681619	2.29616	0.852011	-0.0186309	-0.00925223
2.35	0.8836	2.28959	0.897325	0.145049	-0.0248615	2.34308	0.887691	0.0133931	-0.00602023
2.4	0.9216	2.36384	0.946365	0.0219452	-0.0394032	2.395	0.927178	0.00111993	-0.00739794
2.45	0.9604	2.42059	0.982109	-0.0132804	-0.0404002	2.44546	0.965708	-0.00237765	-0.00734388
2.5	1	2.47302	1.01305	0.333296	0.0611716	2.49573	1.00424	0.0333063	-0.00169716
2.55	1.0404	2.57841	1.07965	0.401054	0.0659731	2.55129	1.04732	0.0398051	0.000821413
2.6	1.0816	2.6885	1.16258	-0.199264	-0.0152079	2.60769	1.09207	-0.0204971	-0.00420688
2.65	1.1236	2.71123	1.18087	-0.0531202	-0.0031717	2.65558	1.13077	-0.00580028	-0.00172733
2.7	1.1664	2.75499	1.21606	-0.30611	-0.0280231	2.70562	1.17185	-0.0310444	-0.00278211
2.75	1.21	2.76352	1.22276	-0.00572967	-0.000213706	2.7522	1.21077	-0.000896274	0.000942769
2.8	1.2544	2.81536	1.2631	0.0613717	0.0118728	2.80295	1.25405	0.00591495	0.00276886
2.85	1.2996	2.87616	1.31271	0.0781314	0.016006	2.85444	1.29918	0.00764495	0.00388806
2.9	1.3456	2.93814	1.36658	-0.172573	0.00284849	2.9059	1.34564	-0.0173962	0.00338799
2.95	1.3924	2.96563	1.39165	-0.111207	0.00735104	2.95375	1.39012	-0.0111944	0.00393664
3	1.44	3.00116	1.42524	-0.162539	0.00839261	3.0022	1.43641	-0.0162809	0.00383422
3.05	1.4884	3.02973	1.45343	-0.352434	0.0116721	3.04976	1.48309	-0.0352407	0.00347843
3.1	1.5376	3.03407	1.45796	-0.0187186	0.0102906	3.0947	1.52832	-0.00186096	0.00282525
3.15	1.5876	3.07966	1.50743	0.44852	-0.0152243	3.14373	1.5788	0.0449159	0.000918072
3.2	1.6384	3.18289	1.61976	-0.00142349	0.00113317	3.19857	1.63624	-0.00011581	0.000520073
3.25	1.69	3.23148	1.67231	-0.274215	0.0109937	3.2478	1.68853	-0.0274091	0.000401087
3.3	1.7424	3.24663	1.68923	0.274046	-0.0183937	3.29371	1.73795	0.0274561	-0.00239786
3.35	1.7956	3.32834	1.78076	0.0303989	-0.00627253	3.34652	1.79532	0.00304213	-0.00239571
3.4	1.8496	3.38164	1.83921	0.319433	-0.0199247	3.39658	1.85002	0.0319346	-0.00418041
3.45	1.9044	3.47168	1.93588	-0.112818	-0.00380667	3.45045	1.90912	-0.0112921	-0.00249158
3.5	1.96	3.50891	1.97541	0.0789937	-0.00716669	3.49931	1.96299	0.00787055	-0.00299923
3.55	2.0164	3.57024	2.04082	0.279524	-0.0120342	3.5507	2.02006	0.0278997	-0.00361344
3.6	2.0736	3.65709	2.13292	-0.194279	0.00373524	3.60472	2.08045	-0.0194308	-0.000396798
3.65	2.1316	3.6852	2.1632	-0.472483	0.0250999	3.65312	2.13516	-0.0472315	0.00277606
3.7	2.1904	3.67975	2.15698	-0.0892202	0.0196427	3.69805	2.18703	-0.00901281	0.00171165
3.75	2.25	3.71721	2.20589	0.0896059	-0.00528342	3.74725	2.24516	0.00896074	0.000689752
3.8	2.3104	3.77376	2.28167	-0.573613	0.0824512	3.79841	2.30672	-0.057698	0.00703477
3.85	2.3716	3.76078	2.26169	0.264366	-0.075766	3.84156	2.36002	0.0276142	-0.000920506
3.9	2.4336	3.82317	2.37249	-0.124493	0.0161038	3.89411	2.42638	-0.0127896	0.00245649
3.95	2.4964	3.85347	2.42102	-0.0341981	-0.00719247	3.94213	2.48779	-0.00356588	0.000977674
4	2.56	3.89295	2.48393	-0.0260981	-0.0167677	3.99107	2.55139	-0.00274888	0.000141097
4.05	2.6244	3.93547	2.54769	0.112833	-0.0477252	4.04014	2.61587	0.0111983	-0.00250136
4.1	2.6896	3.99698	2.63015	0.380224	-0.0734231	4.09093	2.68302	0.0375747	-0.00699541
4.15	2.7556	4.09701	2.74455	-0.09083	-0.0267728	4.14518	2.75435	-0.00948034	-0.00128558
4.2	2.8224	4.14304	2.7924	0.0152821	-0.0192101	4.19466	2.81939	0.00106886	-0.00181137
4.25	2.89	4.20351	2.85356	0.339911	-0.0088458	4.24539	2.88668	0.033276	-0.00566546
4.3	2.9584	4.3054	2.95737	-0.565994	0.0136686	4.29995	2.9592	-0.0563619	0.00731505
4.35	3.0276	4.29346	2.94444	-0.215508	0.038699	4.34456	3.01969	-0.0216899	0.00527847
4.4	3.0976	4.32199	2.98212	0.128126	0.00303441	4.39211	3.08662	0.012397	3.4864e-05
4.45	3.1684	4.38377	3.073	0.337129	-0.0443529	4.44293	3.15958	0.0334244	-0.00479445
4.5	3.24	4.47054	3.19365	0.173847	-0.0120116	4.49628	3.23624	0.017055	-0.00299574
4.55	3.3124	4.54301	3.28856	0.0801165	0.00149292	4.54841	3.31092	0.00777794	-0.00146207
4.6	3.3856	4.60519	3.37075	0.00676527	0.0133305	4.59979	3.38488	0.000510168	0.000279614
4.65	3.4596	4.65801	3.44428	0.172724	-0.0145851	4.65041	3.45857	0.0170716	-0.00219437
4.7	3.5344	4.72789	3.5434	0.147661	-0.0110022	4.70275	3.53552	0.0145786	-0.00162178
4.75	3.61	4.79654	3.63856	0.0458675	0.00558854	4.75498	3.6128	0.00447065	0.000695327
4.8	3.6864	4.8542	3.71973	0.114304	-0.00565303	4.80612	3.68941	0.0112974	-5.38128e-05
4.85	3.7636	4.91847	3.81225	-0.31236	0.0706861	4.85779	3.76796	-0.0311239	0.00900033
4.9	3.8416	4.9369	3.84445	0.148586	-0.0289299	4.90459	3.84133	0.0150958	2.20951e-05
4.95	3.9204	4.99054	3.9517	-0.171106	0.0581524	4.95525	3.92294	-0.01756	0.0060987
5	4	5.01721	4.0086	-0.415409	0.182736	5.00249	4.00051	-0.0439665	0.0124385
5.05	4.0804	5.02031	4.02892	0.175574	-0.167728	5.04616	4.0754	0.0240727	-0.00579089
5.1	4.1616	5.03711	4.15098	-0.0641946	-0.00758475	5.09587	4.16181	-0.00825271	-0.00100073
5.15	4.2436	5.06285	4.2288	0.151659	-0.126766	5.14356	4.24342	0.0149029	-0.00846932
5.2	4.3264	5.11987	4.34128	0.0739643	-0.0844967	5.19439	4.32889	0.00502936	-0.00714299
5.25	4.41	5.1867	4.43009	0.295289	-0.0823273	5.24557	4.41284	0.0261939	-0.0115296
5.3	4.4944	5.28967	4.53882	-0.37954	-0.0420273	5.30009	4.50003	-0.039519	0.00483351
5.35	4.5796	5.30875	4.55668	0.0225824	-0.0118705	5.34841	4.57785	4.93384e-05	0.000104025
5.4	4.6656	5.38135	4.62444	0.0635445	0.0166313	5.39973	4.66306	0.00439504	0.000544884
5.45	4.7524	5.45636	4.70357	0.0265629	0.037266	5.45117	4.74994	0.000939033	0.00240798
5.5	4.84	5.52096	4.78628	0.0572742	0.0434024	5.50186	4.83734	0.0038548	0.00226505
5.55	4.9284	5.58045	4.88138	0.22482	-0.00630925	5.55231	4.92629	0.0205848	-0.00253669
5.6	5.0176	5.65089	5.00584	0.00348588	0.0449807	5.60425	5.01868	-0.00117884	0.00266132
5.65	5.1076	5.69806	5.09835	-0.213351	0.122942	5.65422	5.10845	-0.0234717	0.00928636
5.7	5.1984	5.7169	5.16119	-0.314511	0.276239	5.70119	5.19606	-0.03963	0.0150333
5.75	5.29	5.71042	5.20272	0.0550961	-0.0564086	5.74486	5.28285	0.00693708	-0.000894151
5.8	5.3824	5.68401	5.28082	0.345565	-0.530547	5.79155	5.37827	0.0528474	-0.0210921
5.85	5.4756	5.73646	5.46766	-0.215445	-0.0289022	5.84493	5.48059	-0.0297801	0.00128599
5.9	5.5696	5.77386	5.5232	0.131176	-0.0798219	5.89315	5.56941	0.00540051	-0.0065455
5.95	5.6644	5.85507	5.6243	-0.182067	-0.027883	5.94475	5.66447	-0.023981	0.00309158
6	5.76	5.90289	5.67753	-0.0699081	-0.0064328	5.99388	5.7556	-0.01202	0.00241811
6.05	5.8564	5.9636	5.74798	0.161008	-0.000701486	6.04327	5.84986	0.0110463	-0.0036509
6.1	5.9536	6.04799	5.85526	0.268891	-0.00520291	6.09464	5.94861	0.0222354	-0.00724873
6.15	6.0516	6.14118	5.982	-0.215345	0.0795549	6.14795	6.04942	-0.0239952	0.00738174
6.2	6.1504	6.17644	6.04626	0.250615	-0.0461282	6.197	6.14383	0.0222357	-0.0046548
6.25	6.25	6.2411	6.18939	0.174227	-0.0194527	6.24937	6.24675	0.0148235	-0.00283009
6.3	6.3504	6.30759	6.31686	-0.168879	0.0809134	6.30178	6.34893	-0.0188589	0.00848849
6.35	6.4516	6.33934	6.39398	-0.0132275	0.0450658	6.35056	6.44694	-0.00373885	0.0052115
6.4	6.5536	6.36645	6.49961	0.325431	-0.186291	6.399	6.54893	0.0340603	-0.00958401
6.45	6.6564	6.43588	6.6625	0.0333146	-0.0231677	6.45118	6.65755	0.00150536	-0.00049378
6.5	6.76	6.49914	6.76507	0.0197522	-0.00878353	6.50194	6.76108	0.000464468	0.000483063
6.55	6.8644	6.56206	6.86561	0.0156402	0.00416025	6.55248	6.86531	0.000331916	0.00105332
6.6	6.9696	6.62266	6.96783	-0.083395	0.0409887	6.60271	6.97047	-0.0091552	0.00465164
6.65	7.0756	6.66794	7.05971	0.263425	-0.0812846	6.65151	7.0752	0.025613	-0.00807688
6.7	7.1824	6.74412	7.2076	0.0355477	0.00473458	6.7035	7.18621	0.00281343	-0.00122677
6.75	7.29	6.806	7.31585	0.214956	-0.0408048	6.75477	7.29377	0.0205159	-0.00655608
6.8	7.3984	6.88611	7.45193	-0.241998	0.0806138	6.8081	7.4047	-0.0238778	0.00962207
6.85	7.5076	6.91827	7.52307	-0.246319	0.176884	6.85714	7.50959	-0.0273451	0.014279
6.9	7.6176	6.92266	7.59789	0.044442	-0.0109471	6.90283	7.61609	0.0037119	0.00177253
6.95	7.7284	6.91127	7.71073	-0.0364413	0.016126	6.94922	7.72909	-0.00744112	0.00196618
7	7.84	6.91244	7.81625	-0.0761974	0.00762319	6.99532	7.84085	-0.0119778	0.000734949
7.05	7.9524	6.92115	7.91831	-0.0274279	-0.0634103	7.04159	7.95244	-0.00590007	-0.00403673
7.1	8.0656	6.94875	8.03278	-0.0259648	-0.0803356	7.08944	8.06539	-0.00673208	-0.00519962
7.15	8.1796	7.00105	8.14174	0.147734	-0.117302	7.13887	8.17831	0.00936965	-0.0110613
7.2	8.2944	7.09199	8.26101	0.0118057	-0.0534615	7.19166	8.29373	-0.00387959	-0.00436358
7.25	8.41	7.17503	8.34847	0.349611	-0.0159128	7.24488	8.40704	0.0286746	-0.0120035
7.3	8.5264	7.29949	8.48211	-0.0668226	0.0353211	7.30189	8.52585	-0.00985451	0.00521585
7.35	8.6436	7.36635	8.5723	-0.186637	0.109797	7.35547	8.6394	-0.021502	0.0153756
7.4	8.7616	7.40139	8.66308	0.125707	-4.23412e-05	7.40428	8.75372	0.00896179	0.00551748
7.45	8.8804	7.43237	8.80922	0.0715873	0.000620585	7.45214	8.87512	0.00395628	0.0039941
7.5	9	7.46761	8.94602	-0.279106	0.17421	7.49904	8.99669	-0.0321702	0.0161381
